# Supplementary material
Source: MDPI journal article supplement (https://www.mdpi.com/2311-5637/9/1/74)
Supplement: s1 [file s1 › fermentation-2130383-supplementary.pdf]

Supplementary File S1

MCMC chains, simulations, and correlation matrices.  
Monod kinetics for maximum growth rate and affinity constant.

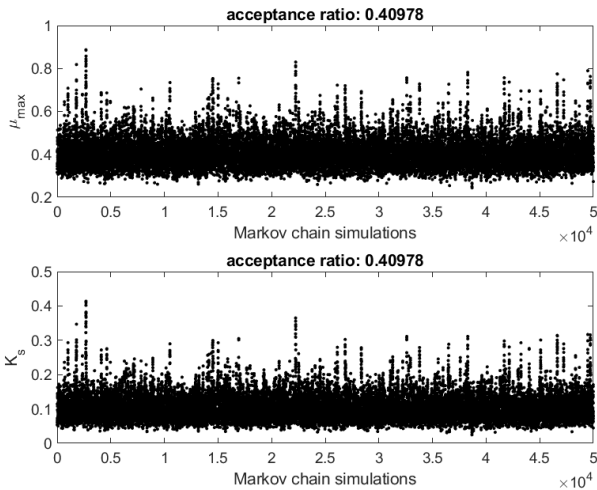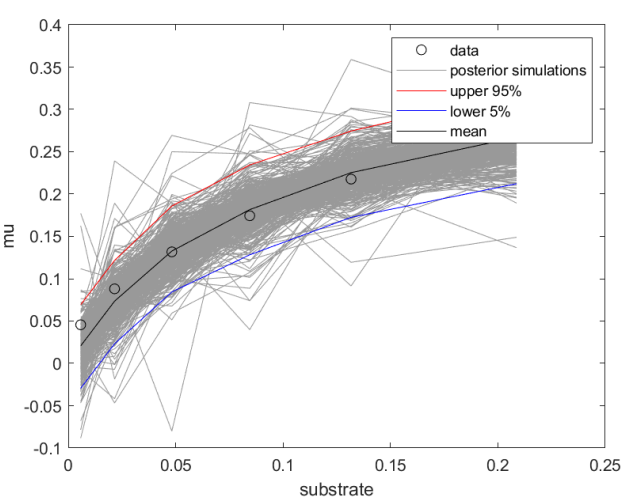

| Correlation matrix parameter estimation |              |        |
|-----------------------------------------|--------------|--------|
|                                         | $\mu_{\max}$ | $K_s$  |
| $\mu_{\max}$                            | 1.0000       | -      |
| $K_s$                                   | 0.9694       | 1.0000 |

Herbert–Pirt distribution for substrate yield and maintenance coefficient.

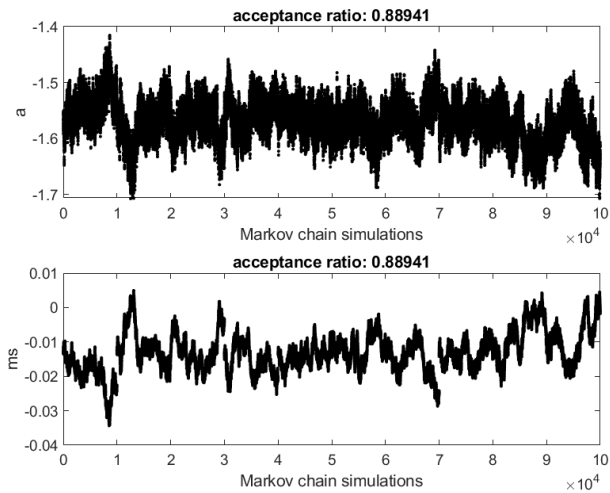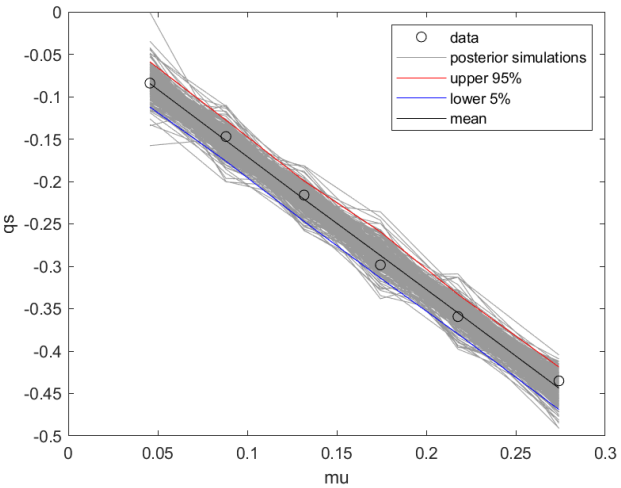

| Correlation matrix parameter estimation |         |        |
|-----------------------------------------|---------|--------|
|                                         | $qs$    | $ms$   |
| $qs$                                    | 1.0000  | -      |
| $ms$                                    | -0.8792 | 1.0000 |

### Herbert–Pirt distribution for O<sub>2</sub> yield and maintenance coefficient.

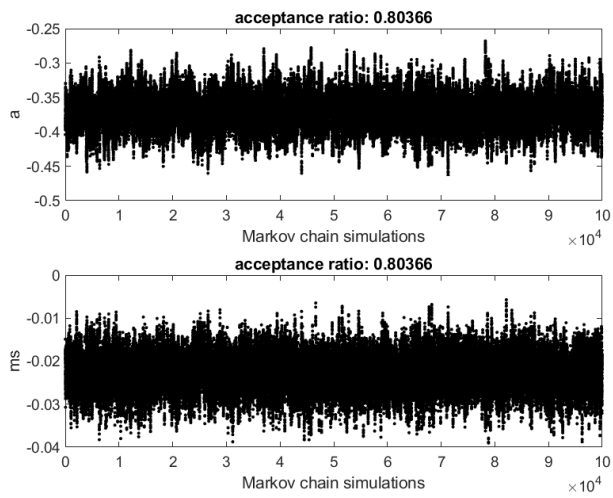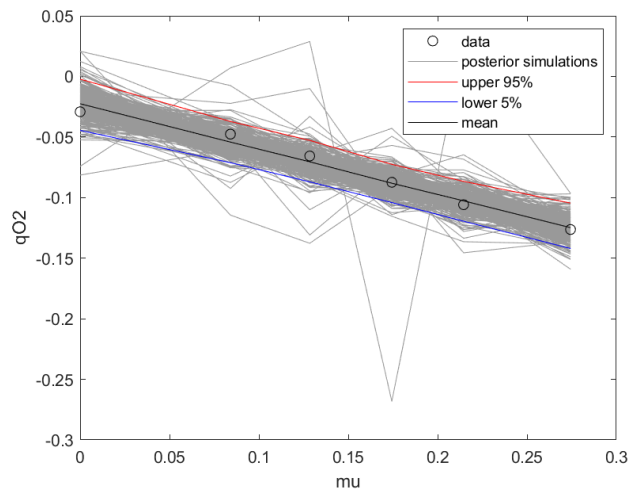

| Correlation matrix parameter estimation |           |           |
|-----------------------------------------|-----------|-----------|
|                                         | $q_{O_2}$ | $m_{O_2}$ |
| $q_{O_2}$                               | 1.0000    | -         |
| $m_{O_2}$                               | -0.8533   | 1.0000    |

### Herbert–Pirt distribution for CO<sub>2</sub> yield and maintenance coefficient.

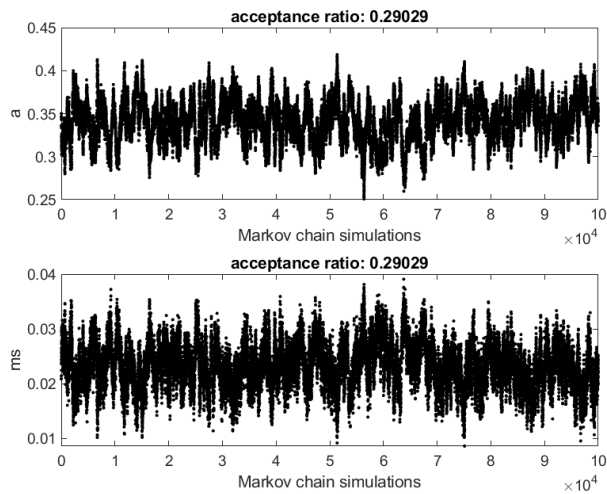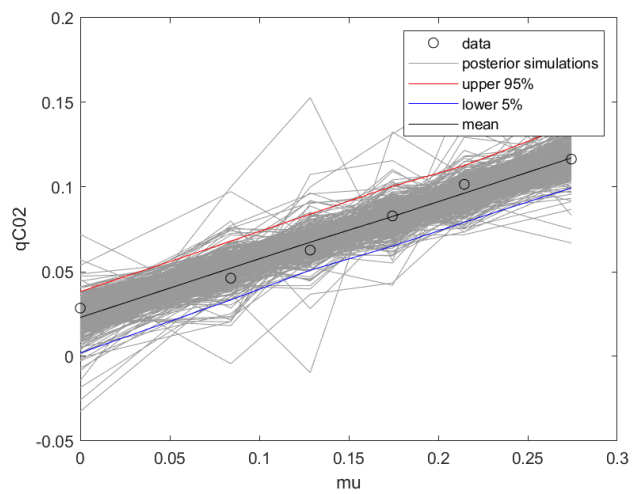

| Correlation matrix parameter estimation |            |            |
|-----------------------------------------|------------|------------|
|                                         | $q_{CO_2}$ | $m_{CO_2}$ |
| $q_{CO_2}$                              | 1.0000     | -          |
| $m_{CO_2}$                              | -0.8487    | 1.0000     |

Supplementary File S2

Repeated parameter estimation, including multiple DO values.

The parameter estimation was repeated, including all values from the chemostats (6 dissolved oxygen values across 3 growth rates). This yielded the results in Table S1 (“estimation with all additional values”).

Table S1. Results from parameter estimations.

|            |                                                    | Original Values—Manu-script |        |          | Estimation with All Addi-tional Values |        |          | Estimation with Additional Values—DO Limitation Omitted |        |          |
|------------|----------------------------------------------------|-----------------------------|--------|----------|----------------------------------------|--------|----------|---------------------------------------------------------|--------|----------|
| Parameters |                                                    | Mean                        | STDEV  | MC error | Mean                                   | STDEV  | MC error | Mean                                                    | STDEV  | MC error |
| Monod      | $\mu_{\max}$ (h <sup>-1</sup> )                    | <b>0.3988</b>               | 0.0670 | 0.0003   | <b>0.1617</b>                          | 0.0197 | 0.0001   | <b>0.2810</b>                                           | 0.0184 | 0.0001   |
|            | $K_s$ (g L <sup>-1</sup> )                         | <b>0.1013</b>               | 0.0387 | 0.0002   | <b>0.0180</b>                          | 0.0120 | 0.0001   | <b>0.0430</b>                                           | 0.0081 | 0.0000   |
| $q^s$      | $a_s$ (mol mol <sup>-1</sup> )                     | <b>-1.5902</b>              | 0.0434 | 0.0002   | <b>-1.3655</b>                         | 0.1690 | 0.0006   | <b>-1.3788</b>                                          | 0.1281 | 0.0005   |
|            | $m_s$ (mol mol <sup>-1</sup> h <sup>-1</sup> )     | <b>-0.0145</b>              | 0.0075 | 0.0000   | <b>-0.0227</b>                         | 0.0193 | 0.0001   | <b>-0.0012</b>                                          | 0.0195 | 0.0001   |
| $q_{O_2}$  | $a_{O_2}$ (mol mol <sup>-1</sup> )                 | <b>-0.3706</b>              | 0.0244 | 0.0001   | <b>-0.2680</b>                         | 0.0635 | 0.0002   | <b>-0.2796</b>                                          | 0.0592 | 0.0002   |
|            | $m_{O_2}$ (mol mol <sup>-1</sup> h <sup>-1</sup> ) | <b>-0.0229</b>              | 0.0042 | 0.0000   | <b>-0.0039</b>                         | 0.0092 | 0.0000   | <b>-0.0080</b>                                          | 0.0091 | 0.0000   |
| $q_{CO_2}$ | $a_{CO_2}$ (mol mol <sup>-1</sup> )                | <b>0.3898</b>               | 0.0262 | 0.0001   | <b>0.2875</b>                          | 0.0635 | 0.0002   | <b>0.2939</b>                                           | 0.0493 | 0.0002   |
|            | $m_{CO_2}$ (mol mol <sup>-1</sup> )                | <b>0.0269</b>               | 0.0045 | 0.0000   | <b>0.0037</b>                          | 0.0091 | 0.0000   | <b>0.0090</b>                                           | 0.0493 | 0.0000   |

These results show that when all chemostat values were incorporated into the estimation, each parameter was affected. Most notably, the maximum growth rate dropped quite significantly. Meanwhile, the standard deviation for the estimated maintenance coefficients also became larger. However, as *Yarrowia lipolytica* is a strictly aerobic organism, it is reasonable to assume that there is a severely-reduced-to-no substrate uptake or growth under anaerobic conditions. These values do not, therefore, provide any additional information for the parameter estimation and instead bias the dataset. This is also depicted in Figure S1, where all data points are plotted and the oxygen-limited chemostat is underlined in red (DO = 0.5% for  $\mu = 0.05, 0.1$ , and  $0.2$ ).

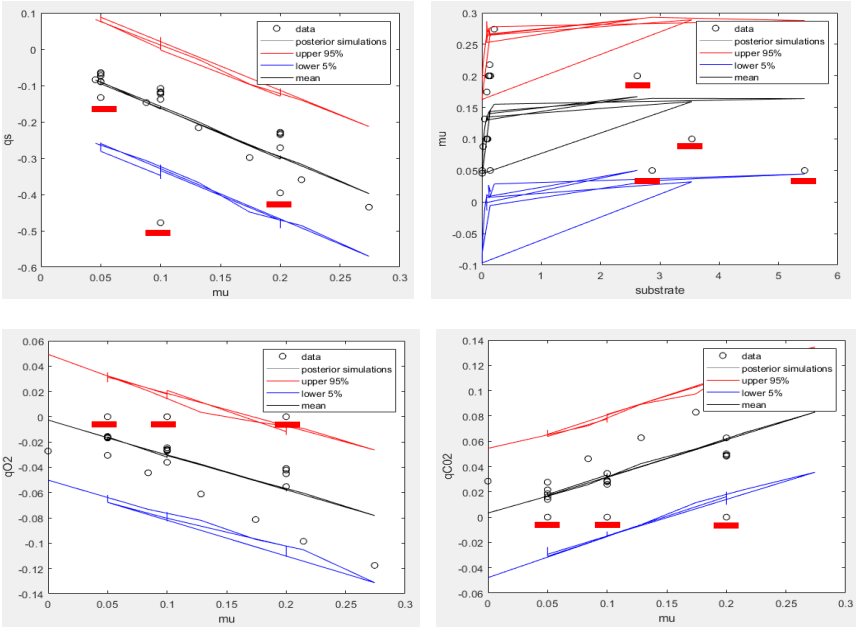

Figure S1. Parameter estimation for all chemostat data, including varying dissolved oxygen concentrations across growth rates. Red underlined data points indicate data from samples under oxygen-limited conditions, where cell washout was observed.

When excluding these oxygen-limited conditions (but keeping the other additional chemostat data), we can see that the estimated values slightly changed with a reduced standard deviation (Table S1 estimation with additional values—DO limitation omitted) and a better fit, which shows in the plotted data points (Figure S2).

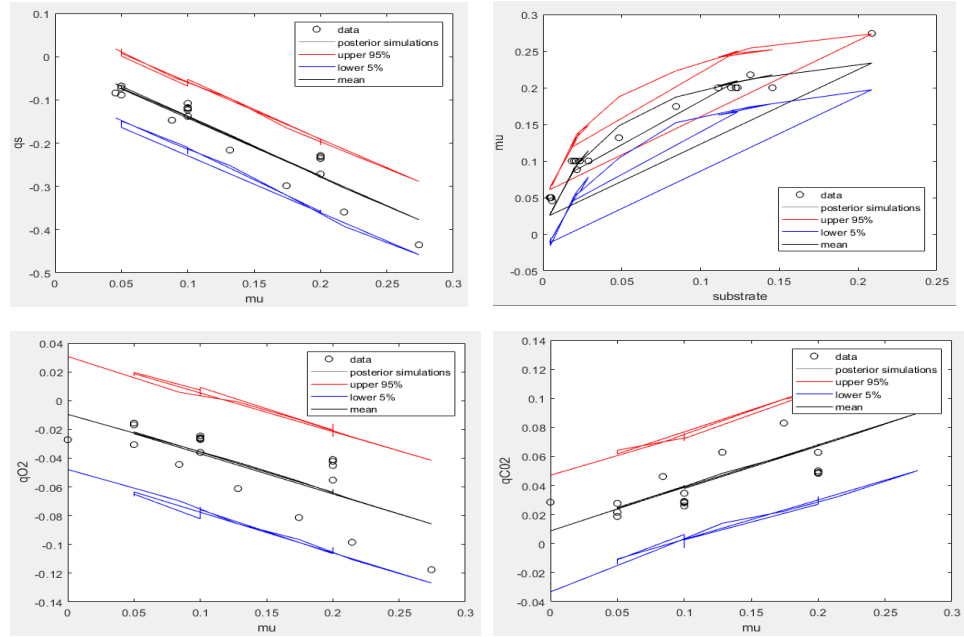

**Figure S2.** Parameter estimation for all available chemostat data, excluding those data points in which oxygen limitation was imposed and cell washout was observed.

This yielded us a parameter estimation that takes into account a broader range of dissolved oxygen concentrations, with values from 2.5 up to 50%. These parameters were then inputted into the compartmental model, of which the results are depicted in Figure S3.

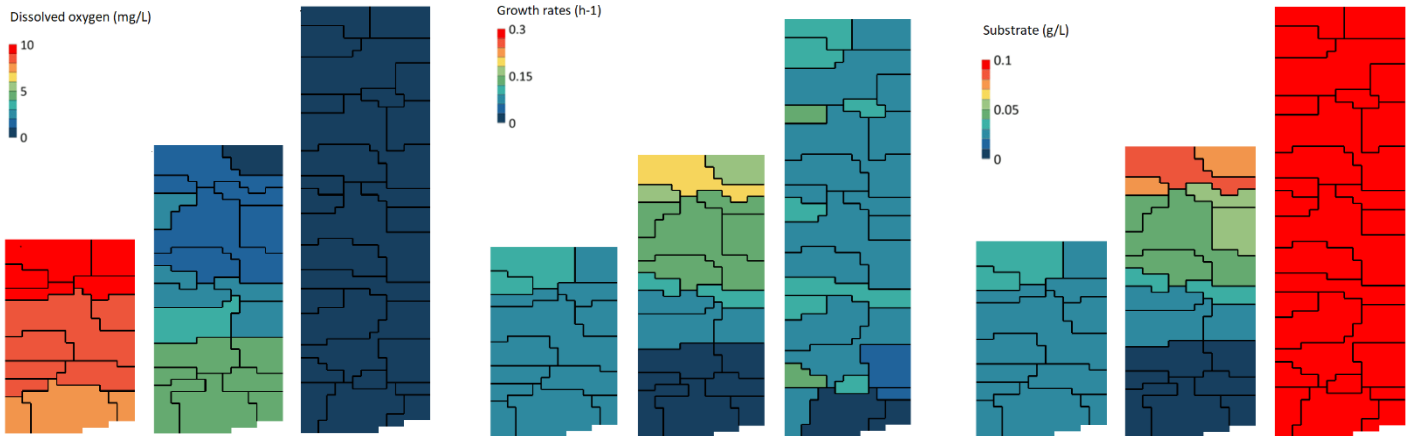

**Figure S3.** Results of the compartmental model on new estimated parameters. From left to right, the dissolved oxygen concentration, growth rate, and substrate concentrations are depicted for the varying volumes.

These outcomes of the compartmental model are very similar to the ones presented in the manuscript, with full oxidative conditions at volumes of 45 and 60 m<sup>3</sup>, whereas the 90 m<sup>3</sup> bioreactor ran into a 77% oxygen limitation.

## Supplementary File S3

### Highly weighted genes in PCA

| Principal Component 1 |                                             |          |
|-----------------------|---------------------------------------------|----------|
| Gene Name             | Suggested Function                          | Loading  |
| YALI1_B12489g         | Triacylglycerol lipase                      | Positive |
| YALI1_A06530g         | Uncharacterized protein                     | Positive |
| YALI1_E30815g         | Alkane monooxygenase                        | Positive |
| YALI1_A09064g         | Uncharacterized transmembrane transporter   | Positive |
| YALI1_D07831g         | CAP domain-containing protein               | Positive |
| YALI1_C21946g         | Uncharacterized transmembrane transporter   | Positive |
| YALI1_C21946g         | Uncharacterized transmembrane transporter   | Positive |
| YALI1_C08523g         | General substrate transporter               | Positive |
| YALI1_F38013g         | Uncharacterized protein                     | Positive |
| YALI1_D04128g         | Uncharacterized protein                     | Positive |
| YALI1_C16961g         | Transmembrane amino acid transporter        | Negative |
| YALI1_B09211g         | Keto reductase domain-containing protein    | Negative |
| YALI1_B28454g         | 4-hydroxyphenylpyruvate dioxygenase         | Negative |
| YALI1_A03688g         | Uncharacterized protein                     | Negative |
| YALI1_A04006g         | Uncharacterized protein                     | Negative |
| YALI1_B28394g         | D-galacturonate reductase                   | Negative |
| YALI1_A15624g         | Transmembrane transporter                   | Negative |
| YALI1_A13508g         | Uncharacterized protein                     | Negative |
| YALI1_E28300g         | Phosphate transporter                       | Negative |
| YALI1_D06233          | Uncharacterized protein                     | Negative |
| Principal component 2 |                                             |          |
| Gene name             | Suggested function                          | Loading  |
| YALI1_A21203g         | Elongation factor                           | Positive |
| YALI1_A09553g         | Thiamine thiazole synthase                  | Positive |
| YALI1_E17326g         | Formate dehydrogenase                       | Positive |
| YALI1_F02592g         | Beta-glucosidase                            | Positive |
| YALI1_F26167g         | ADP/ATP translocase                         | Positive |
| YALI1_B10525g         | Epimerase domain-containing protein         | Positive |
| YALI1_D30899g         | Uncharacterized protein                     | Positive |
| YALI1_B08461g         | High-affinity glucose transporter           | Positive |
| YALI1_A00148g         | Uncharacterized protein                     | Positive |
| YALI1_A06099g         | Cerevisin (protease)                        | Positive |
| YALI1_E14619g         | Amidase signature domain-containing protein | Negative |
| YALI1_D15568g         | Uncharacterized protein                     | Negative |
| YALI1_E08620g         | Urea amidolyase                             | Negative |
| YALI1_B23522g         | Uncharacterized protein                     | Negative |
| YALI1_B14544g         | Ferric reductase NAD binding domain         | Negative |
| YALI1_E29481g         | Glycosidase                                 | Negative |
| YALI1_C15610g         | Uncharacterized protein                     | Negative |
| YALI1_C21924g         | Uncharacterized protein                     | Negative |
| YALI1_D19721g         | Globin-like protein                         | Negative |
| YALI1_F04314g         | Kinase-like domain-containing protein       | Negative |
